# Supplementary material for: Enhancing the H 2 yield from photoreforming of natural lignocellulose feedstock by two-stage thermo-alkaline hydrolysis pretreatment
Source: Royal Society of Chemistry journal article supplement (doi:10.1039/d4su00142g), 2024-01-01
Supplement: d4su00142g1.pdf [file d4su00142g1.pdf]

## Supporting Information

### Enhancing H<sub>2</sub> yield from photoreforming of natural lignocellulose feedstock by two-stage thermo-alkaline hydrolysis pretreatment

Wei Wang<sup>1,3</sup>, Zhenyu Jin<sup>1</sup>, Binhai Cheng<sup>1,4\*</sup>, Ming Zhao<sup>1,2\*</sup>

<sup>1</sup> School of Environment, Tsinghua University, Beijing 100084, China.

<sup>2</sup> Research Institute for Environmental Innovation (Suzhou), Tsinghua, Suzhou 215263, China.

<sup>3</sup> Huaneng Clean Energy Research Institute, Beijing, 102209, China

<sup>4</sup> School of Resources and Environmental Engineering, Hefei University of Technology, Hefei, 230009, China

Submitted to *RSC Sustainability*

\* Corresponding Author

**Email:** [ming.zhao@mail.tsinghua.edu.cn](mailto:ming.zhao@mail.tsinghua.edu.cn)

bhcheng1@mail.ustc.edu.cn (Binhai Cheng)

Phone: (+86) 010-62784701

---

## **Materials and methods**

### **1.1 Catalyst synthesis.**

SrTiO<sub>3</sub>-0.5 wt.%Pt were synthesized following a previous report[1, 2]. In a typical synthesis, 1000 mg of SrTiO<sub>3</sub> and 250 ml deionized water were added into a 500 ml beaker with. After ultrasonic 20 min, 125 μl H<sub>2</sub>PtCl<sub>8</sub> solution was dropwise added into the beaker and stirred for 30 min. The solution was then stirred and dried at 80 °C. Finally, the samples were calcined in air at 500 °C for 3 h to remove the residual chlorine. It was then cooled naturally to room temperature.

### **1.2 Ion chromatography analysis.**

Organic acids in TAH/TS-TAH of natural lignocellulose waste were tested by Ion chromatography with gradient elution method[1]. The column temperature and flow rate were set to 35 °C and 1 ml/min respectively.

### **1.3 Gas chromatography-mass spectrometry analysis.**

Other components in TAH/TS-TAH of natural lignocellulose feedstock were analyzed by gas chromatography-mass spectrometry (GC-MS, Agilent 7890A-5975C, USA)[1]. The carrier gas was He and the GC column oven was 45 °C holding for 5 min. Then the column temperature was raised to 250 °C at a rate of 5 °C/min. All samples were extracted with dichloromethane before tested.

---

## Supporting Figures

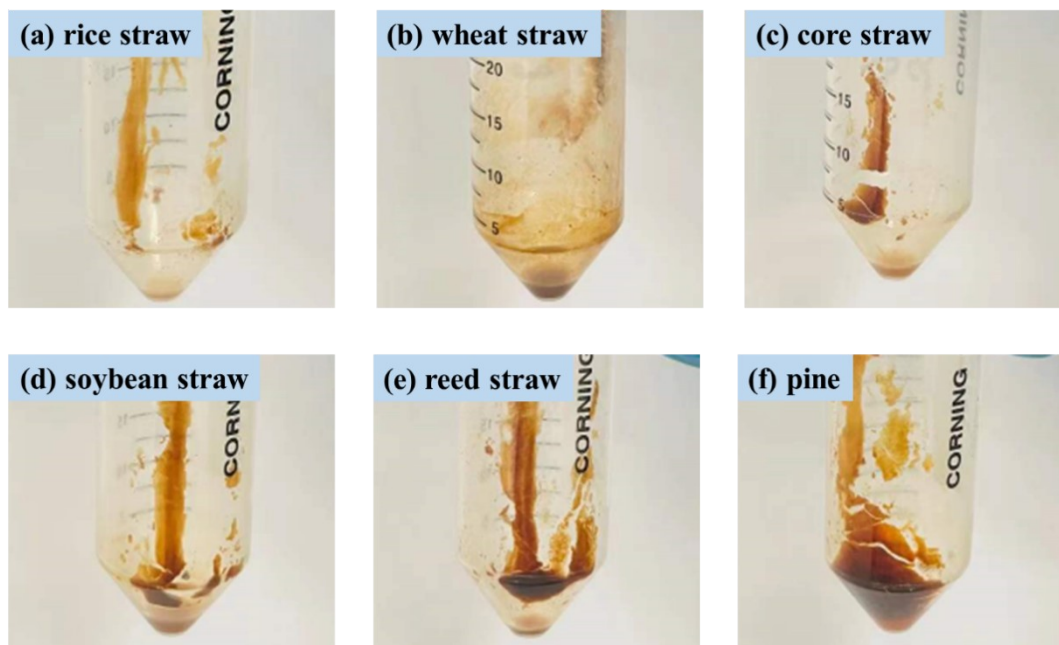

**Fig. S1 TAH-AS of natural lignocellulose waste.**

---

## The calculation of carbon balance

In the calculation, the chemical formulas of cellulose, hemicellulose and lignin are

$(C_6H_{10}O_5)_n$ ,  $(C_5H_8O_4)_n$ ,  $(C_{81}H_{92}O_{28})_n$ . The relevant formulas are shown below.

$$C_{cellulose} = \frac{M_C \times 6}{M_C \times 6 + M_H \times 10 + M_O \times 5}$$

$$C_{hemicellulose} = \frac{M_C \times 5}{M_C \times 5 + M_H \times 8 + M_O \times 4}$$

$$C_{cellulose} = \frac{M_C \times 81}{M_C \times 81 + M_H \times 92 + M_O \times 28}$$

$$C_{lactic} = \frac{M_C \times 3}{M_C \times 3 + M_H \times 6 + M_O \times 3}$$

$$C_{acetic} = \frac{M_C \times 2}{M_C \times 2 + M_H \times 4 + M_O \times 2}$$

$$C_{propionic} = \frac{M_C \times 3}{M_C \times 3 + M_H \times 5 + M_O \times 2}$$

$$C_{formic} = \frac{M_C \times 1}{M_C \times 1 + M_H \times 2 + M_O \times 2}$$

$$C_{tartaric} = \frac{M_C \times 4}{M_C \times 4 + M_H \times 6 + M_O \times 6}$$

$$C_{oxalic} = \frac{M_C \times 2}{M_C \times 2 + M_H \times 2 + M_O \times 4}$$

In the formulas, CX means the content of element C in certain substance X. Natural lignocellulose feedstocks were fixed at 8,000 mg/L in the research. We could calculate the amount of element C in natural lignocellulose feedstocks since the proportion of cellulose, hemicellulose and lignin were given. We could also calculate the element C in small-molecule acid. Then we could verify the carbon balance between natural lignocellulose feedstocks and small-molecule acid.

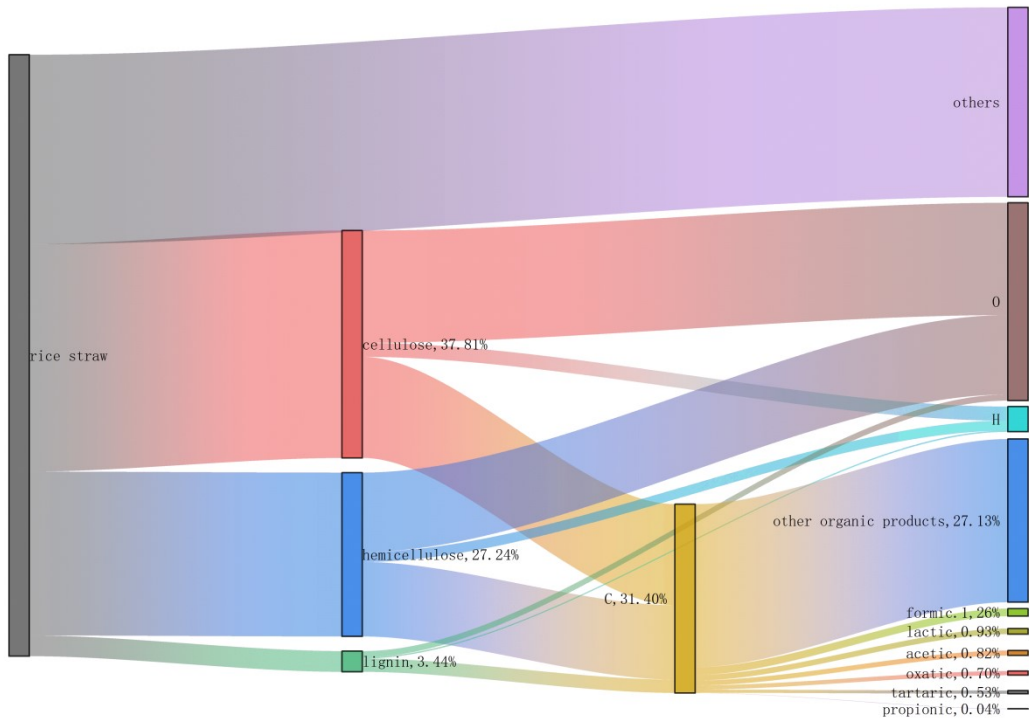

**Fig. S2 Fate of element C in rice straw.**

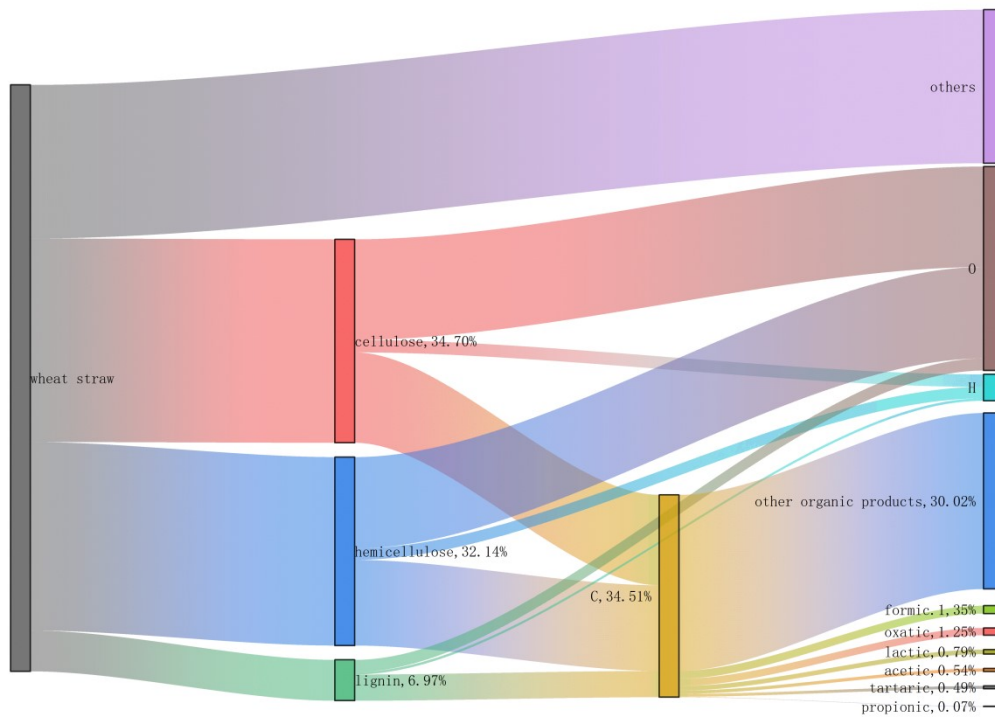

**Fig. S3 Fate of element C in wheat straw.**

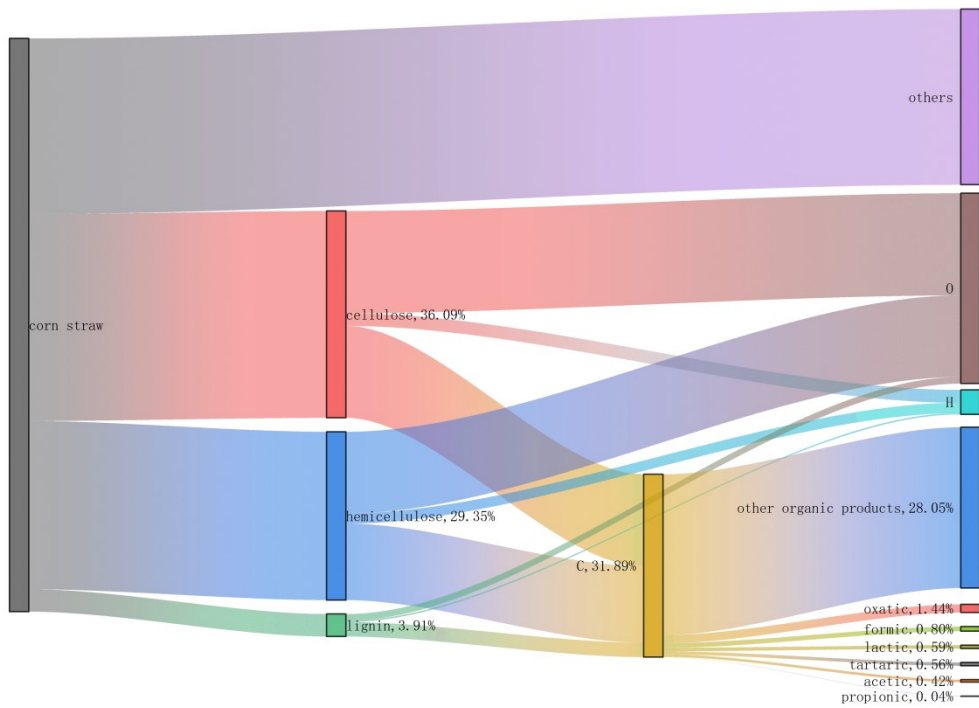

**Fig. S4 Fate of element C in corn straw.**

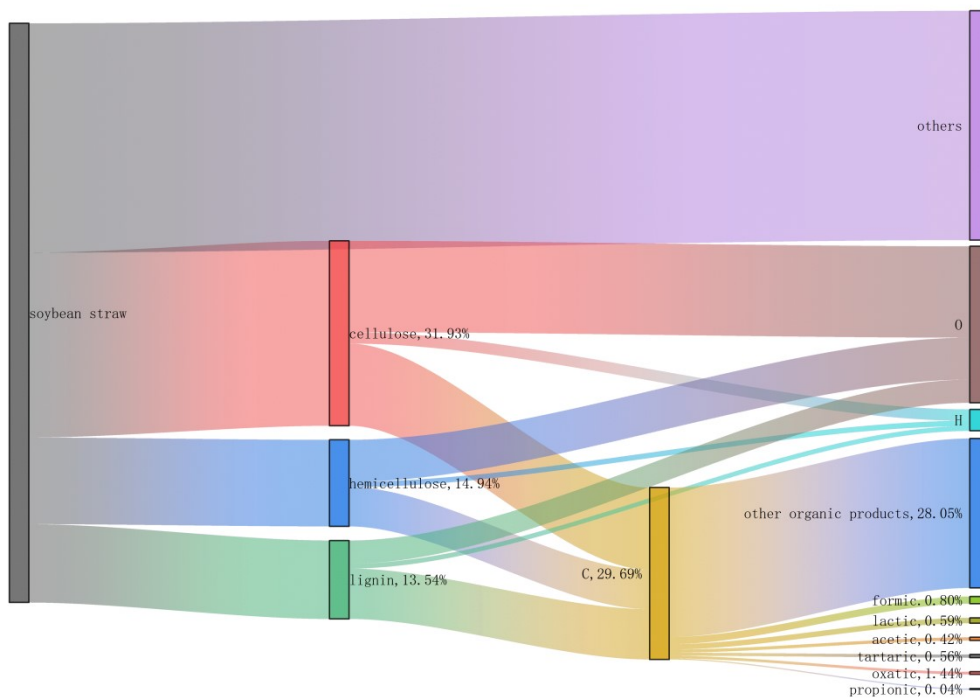

**Fig. S5 Fate of element C in soybean straw.**



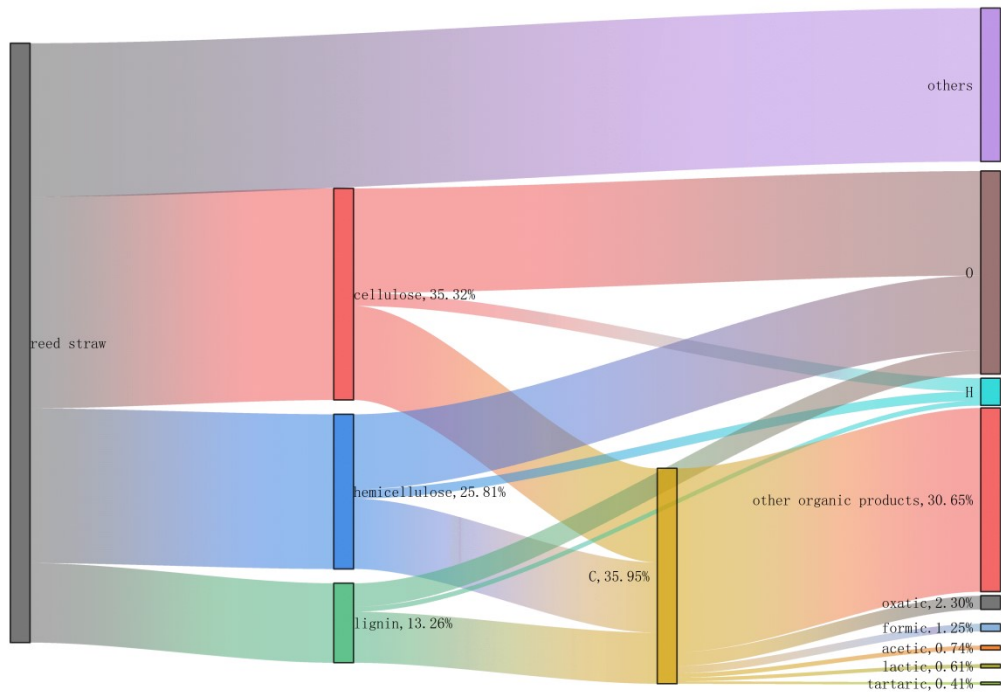

**Fig. S6 Fate of element C in reed straw.**

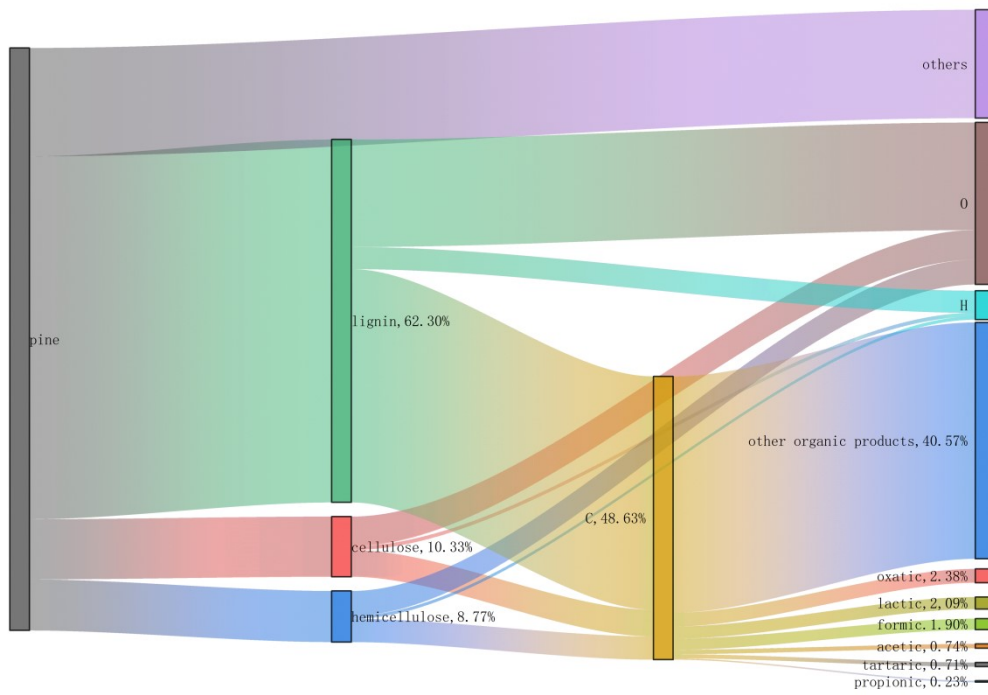

**Fig. S7 Fate of element C in pine.**

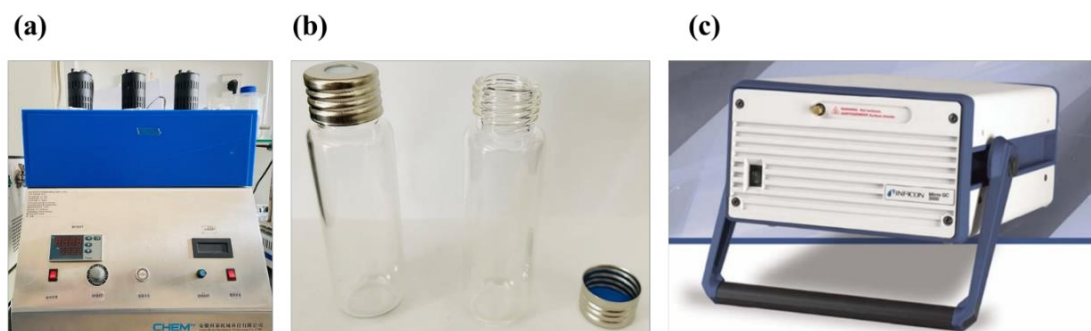

**Fig.S8 (a)customized photoreactor;(b)customized reaction bulb;(c)Micro GC**

---

## Supporting Tables

**Table S1 Elemental analysis of natural lignocellulose waste**

| Samples          | C<br>(wt.%) | H<br>(wt.%) | O<br>(wt.%) | N<br>(wt.%) | S<br>(wt.%) | Si<br>(wt.%) | Total<br>(%) |
|------------------|-------------|-------------|-------------|-------------|-------------|--------------|--------------|
| rice straw       | 38.75       | 5.31        | 38.23       | 0.82        | 0.10        | 6.43         | 89.64        |
| wheat<br>straw   | 42.11       | 5.50        | 41.27       | 0.78        | 0.13        | 2.13         | 91.92        |
| corn straw       | 41.81       | 5.64        | 42.20       | 1.17        | 0.12        | 2.43         | 93.37        |
| soybean<br>straw | 41.94       | 5.59        | 39.89       | 1.17        | 0.13        | 0.79         | 89.51        |
| reed straw       | 43.60       | 5.69        | 37.90       | 2.06        | 0.19        | 1.98         | 91.42        |
| pine             | 46.92       | 5.99        | 42.55       | 0.21        | 0.02        | 0.70         | 96.39        |

---

**Table S2 Industrial analysis of natural lignocellulose waste**

| Samples       | Moisture (wt.%) | Ash (wt.%) | Volatiles (wt.%) | Fixed carbon (wt.%) |
|---------------|-----------------|------------|------------------|---------------------|
| rice straw    | 7.38            | 11.87      | 63.32            | 17.44               |
| wheat straw   | 7.18            | 5.15       | 68.37            | 19.30               |
| corn straw    | 7.15            | 6.87       | 66.78            | 19.20               |
| soybean straw | 8.29            | 3.83       | 69.80            | 18.09               |
| reed straw    | 6.55            | 7.66       | 67.65            | 18.14               |
| pine          | 7.23            | 0.11       | 74.68            | 17.99               |

---

**Table S3 Distribution of main organic products in TAH solution of natural lignocellulose wastes**

| TAH           | Detected Species                          | Molecular Formula                                | Area Pct (%) |
|---------------|-------------------------------------------|--------------------------------------------------|--------------|
| rice straw    | Undecane                                  | C <sub>11</sub> H <sub>24</sub>                  | 34.89        |
|               | 6-ethyloct-3-yl-propyl ester-Oxalic acid  | C <sub>15</sub> H <sub>28</sub> O <sub>4</sub>   | 10.58        |
|               | 2-cyano-Acetamide                         | C <sub>3</sub> H <sub>4</sub> N <sub>2</sub> O   | 6.62         |
|               | 4-aminocarbonyl-methyl ester-Benzoic acid | C <sub>9</sub> H <sub>9</sub> NO <sub>3</sub>    | 6.02         |
| wheat straw   | 2,3,4-trimethyl-Hexane                    | C <sub>9</sub> H <sub>20</sub>                   | 33.96        |
|               | 2-methyl-Decane                           | C <sub>11</sub> H <sub>24</sub>                  | 6.68         |
|               | 5-Aminoisoxazole                          | C <sub>3</sub> H <sub>4</sub> N <sub>2</sub> O   | 6.10         |
|               | 2-ethyl-1-methyl-Pyrrolidine              | C <sub>7</sub> H <sub>15</sub> N                 | 5.30         |
|               | Piperidine                                | C <sub>5</sub> H <sub>11</sub> N                 | 3.93         |
| corn straw    | Undecane                                  | C <sub>11</sub> H <sub>24</sub>                  | 28.08        |
|               | Octacosane                                | C <sub>28</sub> H <sub>58</sub>                  | 11.93        |
|               | 2-Propenamide                             | C <sub>3</sub> H <sub>5</sub> NO                 | 6.59         |
|               | 2,4,4-trimethyl-Hexane                    | C <sub>9</sub> H <sub>20</sub>                   | 4.65         |
|               | ethyl-1-methyl-Pyrrolidine                | C <sub>7</sub> H <sub>15</sub> N                 | 4.18         |
| soybean straw | 2-methyl-Octane                           | C <sub>9</sub> H <sub>20</sub>                   | 32.23        |
|               | Heptadecane                               | C <sub>17</sub> H <sub>36</sub>                  | 11.06        |
|               | 3-ethylhexane                             | C <sub>8</sub> H <sub>16</sub>                   | 7.03         |
|               | hexyl pentyl ester-Sulfurous acid         | C <sub>11</sub> H <sub>24</sub> O <sub>3</sub> S | 5.78         |
|               | 2-ethyl-2-methyl-Oxazolidine              | C <sub>6</sub> H <sub>13</sub> NO                | 4.59         |
| reed straw    | 1,8-Nonadien-3-ol                         | C <sub>9</sub> H <sub>16</sub> O                 | 28.51        |
|               | 3-methyl-5-propyl-Nonane                  | C <sub>13</sub> H <sub>28</sub>                  | 11.00        |
|               | Piperazine                                | C <sub>4</sub> H <sub>10</sub> N <sub>2</sub>    | 9.11         |
| pine          | Undecane                                  | C <sub>11</sub> H <sub>24</sub>                  | 25.94        |
|               | 2,3,6-trimethyl-Decane                    | C <sub>13</sub> H <sub>28</sub>                  | 12.79        |
|               | 2,3-dimethoxy-Benzamide                   | C <sub>9</sub> H <sub>11</sub> NO <sub>3</sub>   | 10.83        |
|               | 5,6-dimethyl-Decane                       | C <sub>12</sub> H <sub>26</sub>                  | 6.33         |
|               | 2,6-Dimethyldecane                        | C <sub>12</sub> H <sub>26</sub>                  | 5.67         |
|               | 3,4,5,6-tetramethyl-Octane                | C <sub>12</sub> H <sub>26</sub>                  | 5.21         |

**Table S4 Distribution of organic products in TAH-AS of natural lignocellulose**

**wastes**

| TAH-AS        | Detected Species                                         | Molecular Formula                                              | Area Pct (%) |
|---------------|----------------------------------------------------------|----------------------------------------------------------------|--------------|
| rice straw    | 1,3-bis(1,1-dimethylethyl)-Benzene                       | C <sub>14</sub> H <sub>22</sub>                                | 9.46         |
|               | 2,4-bis(1,1-dimethylethyl)-Phenol                        | C <sub>14</sub> H <sub>22</sub> O                              | 4.52         |
|               | 2,2'-methylenebis[6-(1,1-dimethylethyl)-4-methyl-Phenol] | C <sub>23</sub> H <sub>32</sub> O <sub>2</sub>                 | 3.16         |
|               | 1,3-bis(1-methylethenyl)-Benzene                         | C <sub>12</sub> H <sub>14</sub>                                | 2.67         |
| wheat straw   | 2,4-bis(1,1-dimethylethyl)-Phenol                        | C <sub>14</sub> H <sub>22</sub> O                              | 12.24        |
|               | 1,3-bis(1,1-dimethylethyl)-Benzene                       | C <sub>14</sub> H <sub>22</sub>                                | 3.95         |
|               | 2,4,6-trimethyl-Decane                                   | C <sub>13</sub> H <sub>28</sub>                                | 2.20         |
|               | 2,6,10-trimethyl-Tetradecane                             | C <sub>17</sub> H <sub>36</sub>                                | 1.59         |
| corn straw    | 1,3-bis(1,1-dimethylethyl)-Benzene                       | C <sub>14</sub> H <sub>22</sub>                                | 12.52        |
|               | 2,2'-methylenebis[6-(1,1-dimethylethyl)-4-methyl-Phenol] | C <sub>23</sub> H <sub>32</sub> O <sub>2</sub>                 | 5.81         |
|               | 2,4-bis(1,1-dimethylethyl)-Phenol                        | C <sub>14</sub> H <sub>22</sub> O                              | 3.74         |
|               | Eicosane                                                 | C <sub>20</sub> H <sub>42</sub>                                | 1.12         |
| soybean straw | 1,3-bis(1,1-dimethylethyl)-Benzene                       | C <sub>14</sub> H <sub>22</sub>                                | 12.63        |
|               | 2,4-bis(1,1-dimethylethyl)-Phenol                        | C <sub>14</sub> H <sub>22</sub> O                              | 6.05         |
|               | Eicosane                                                 | C <sub>20</sub> H <sub>42</sub>                                | 4.54         |
|               | 2,2'-methylenebis[6-(1,1-dimethylethyl)-4-methyl-Phenol] | C <sub>23</sub> H <sub>32</sub> O <sub>2</sub>                 | 1.95         |
| reed straw    | 2,4-bis(1,1-dimethylethyl)-Phenol                        | C <sub>14</sub> H <sub>22</sub> O                              | 10.92        |
|               | 1,3-bis(1,1-dimethylethyl)-Benzene                       | C <sub>14</sub> H <sub>22</sub>                                | 5.02         |
|               | 2,2'-methylenebis[6-(1,1-dimethylethyl)-4-methyl-Phenol] | C <sub>23</sub> H <sub>32</sub> O <sub>2</sub>                 | 4.98         |
|               | Cyclohexasiloxane dodecamethyl                           | C <sub>12</sub> H <sub>36</sub> O <sub>6</sub> S <sub>i6</sub> | 2.20         |
| pine          | 1,3-bis(1,1-dimethylethyl)-Benzene                       | C <sub>14</sub> H <sub>22</sub>                                | 12.56        |
|               | 2,4-bis(1,1-dimethylethyl)-Phenol                        | C <sub>14</sub> H <sub>22</sub> O                              | 5.77         |
|               | Eicosane                                                 | C <sub>20</sub> H <sub>42</sub>                                | 5.32         |

---

---

2,2'-methylenebis[6-(1,1-dimethylethyl)-4-methyl-  
Phenol

---

$C_{23}H_{32}O_2$  1.89



**Table S5 Distribution of other organic products in TS-TAH solution of natural lignocellulose wastes**

| TS-TAH        | Detected Species                                         | Molecular Formula                              | Area Pct(%) |
|---------------|----------------------------------------------------------|------------------------------------------------|-------------|
| rice straw    | 3-ethyl-Hexane                                           | C <sub>8</sub> H <sub>16</sub>                 | 38.23       |
|               | Butylated Hydroxytoluene                                 | C <sub>15</sub> H <sub>24</sub> O              | 27.03       |
|               | 2,2'-methylenebis[6-(1,1-dimethylethyl)-4-methyl-Phenol] | C <sub>23</sub> H <sub>32</sub> O <sub>2</sub> | 13.11       |
| wheat straw   | Octane                                                   | C <sub>8</sub> H <sub>18</sub>                 | 49.05       |
|               | Butylated Hydroxytoluene                                 | C <sub>15</sub> H <sub>24</sub> O              | 18.04       |
|               | 2,2'-methylenebis[6-(1,1-dimethylethyl)-4-methyl-Phenol] | C <sub>23</sub> H <sub>32</sub> O <sub>2</sub> | 8.21        |
| corn straw    | Octane                                                   | C <sub>8</sub> H <sub>18</sub>                 | 56.42       |
|               | Butylated Hydroxytoluene                                 | C <sub>15</sub> H <sub>24</sub> O              | 36.42       |
|               | 2,2'-methylenebis[6-(1,1-dimethylethyl)-4-methyl-Phenol] | C <sub>23</sub> H <sub>32</sub> O <sub>2</sub> | 5.32        |
| soybean straw | Octane                                                   | C <sub>8</sub> H <sub>18</sub>                 | 40.10       |
|               | Butylated Hydroxytoluene                                 | C <sub>15</sub> H <sub>24</sub> O              | 26.64       |
|               | 2,2'-methylenebis[6-(1,1-dimethylethyl)-4-methyl-Phenol] | C <sub>23</sub> H <sub>32</sub> O <sub>2</sub> | 18.79       |
| reed straw    | Octane                                                   | C <sub>8</sub> H <sub>18</sub>                 | 53.56       |
|               | Butylated Hydroxytoluene                                 | C <sub>15</sub> H <sub>24</sub> O              | 33.23       |
|               | 2,2'-methylenebis[6-(1,1-dimethylethyl)-4-methyl-Phenol] | C <sub>23</sub> H <sub>32</sub> O <sub>2</sub> | 7.00        |
| pine          | Butylated Hydroxytoluene                                 | C <sub>15</sub> H <sub>24</sub> O              | 26.87       |
|               | 2,2'-methylenebis[6-(1,1-dimethylethyl)-4-methyl-Phenol] | C <sub>23</sub> H <sub>32</sub> O <sub>2</sub> | 24.31       |
|               | Octane                                                   | C <sub>8</sub> H <sub>18</sub>                 | 6.20        |
|               | 5-Eicosene                                               | C <sub>20</sub> H <sub>40</sub>                | 3.36        |

**Table S6 Distribution of other organic products in TS-TAH-30 solution of natural lignocellulose wastes**

| TS-TAH-30     | Detected Species                                         | Molecular Formula                              | Area Pct (%) |
|---------------|----------------------------------------------------------|------------------------------------------------|--------------|
| rice straw    | 2,2'-methylenebis[6-(1,1-dimethylethyl)-4-methyl-Phenol] | C <sub>23</sub> H <sub>32</sub> O <sub>2</sub> | 35.16        |
|               | 2,4-dimethyl-Hexane                                      | C <sub>8</sub> H <sub>18</sub>                 | 24.44        |
|               | Butylated Hydroxytoluene                                 | C <sub>15</sub> H <sub>24</sub> O              | 18.04        |
| wheat straw   | Octane                                                   | C <sub>8</sub> H <sub>18</sub>                 | 48.01        |
|               | Butylated Hydroxytoluene                                 | C <sub>15</sub> H <sub>24</sub> O              | 32.80        |
|               | 2,2'-methylenebis[6-(1,1-dimethylethyl)-4-methyl-Phenol] | C <sub>23</sub> H <sub>32</sub> O <sub>2</sub> | 9.11         |
| corn straw    | Octane                                                   | C <sub>8</sub> H <sub>18</sub>                 | 49.51        |
|               | Butylated Hydroxytoluene                                 | C <sub>15</sub> H <sub>24</sub> O              | 33.89        |
|               | 2,2'-methylenebis[6-(1,1-dimethylethyl)-4-methyl-Phenol] | C <sub>23</sub> H <sub>32</sub> O <sub>2</sub> | 8.02         |
| soybean straw | 2,2'-methylenebis[6-(1,1-dimethylethyl)-4-methyl-Phenol] | C <sub>23</sub> H <sub>32</sub> O <sub>2</sub> | 31.19        |
|               | Octane                                                   | C <sub>8</sub> H <sub>18</sub>                 | 30.75        |
|               | Butylated Hydroxytoluene                                 | C <sub>15</sub> H <sub>24</sub> O              | 18.75        |
| reed straw    | 2,2'-methylenebis[6-(1,1-dimethylethyl)-4-methyl-Phenol] | C <sub>23</sub> H <sub>32</sub> O <sub>2</sub> | 35.16        |
|               | 2,4-dimethyl-Hexane                                      | C <sub>8</sub> H <sub>18</sub>                 | 24.44        |
|               | Butylated Hydroxytoluene                                 | C <sub>15</sub> H <sub>24</sub> O              | 18.04        |
| pine          | Octane                                                   | C <sub>8</sub> H <sub>18</sub>                 | 30.24        |
|               | Butylated Hydroxytoluene                                 | C <sub>15</sub> H <sub>24</sub> O              | 19.65        |
|               | 2,2'-methylenebis[6-(1,1-dimethylethyl)-4-methyl-Phenol] | C <sub>23</sub> H <sub>32</sub> O <sub>2</sub> | 19.31        |

**Table S7 Estimation PR hydrogen enhancement efficiency of organic acids in TS-TAH of corn stover**

| TS-TAH                  | Organic acids as a share of TSC (wt.%), <b>a</b> | PR hydrogen yield for different single organic acids derived from TS-TAH ( $\mu\text{mol}$ , 12 h), <b>b</b> | Actual contribution of hydrogen yield in TS-TAH ( $\mu\text{mol}$ , 12 h), <b>c</b> |
|-------------------------|--------------------------------------------------|--------------------------------------------------------------------------------------------------------------|-------------------------------------------------------------------------------------|
| lactic acid             | 1.5                                              | 11.68                                                                                                        | 0.17                                                                                |
| acetic acid             | 1.1                                              | 0.25                                                                                                         | 0.0026                                                                              |
| propionic acid          | 0.8                                              | 1.00                                                                                                         | 0.008                                                                               |
| formic acid             | 3.1                                              | 8.33                                                                                                         | 0.25                                                                                |
| tartaric acid           | 1.8                                              | 22.24                                                                                                        | 0.39                                                                                |
| oxalic acid             | 5.4                                              | 0.22                                                                                                         | 0.012                                                                               |
| Total                   | 13.7                                             | -                                                                                                            | 0.83                                                                                |
| PR TS-TAH of core straw | -                                                | 4.7                                                                                                          | 4.7                                                                                 |

**Note:  $c = a \times b$**

---

**Table S8 Quantity of organic acid generated from TS-TAH**

| Samples          | Cellulose<br>(wt.%) | Hemicellulose<br>(wt.%) | Lignin<br>(wt.%) | Cellulose<br>(mg/L) | Hemicellulose<br>(mg/L) | Lignin<br>(mg/L) | Lactic<br>(mg/L) | Acetic<br>(mg/L) | Propionic<br>(mg/L) | Formic<br>(mg/L) | Tartaric<br>(mg/L) | Oxalic<br>(mg/L) |
|------------------|---------------------|-------------------------|------------------|---------------------|-------------------------|------------------|------------------|------------------|---------------------|------------------|--------------------|------------------|
| rice<br>straw    | 37.81               | 27.24                   | 3.440            | 3025                | 2179                    | 275.2            | 185.1            | 164.0            | 6.014               | 387.2            | 132.2              | 209.2            |
| wheat<br>straw   | 34.70               | 32.14                   | 6.970            | 2776                | 2571                    | 557.6            | 157.0            | 108.4            | 11.18               | 415.2            | 123.7              | 374.5            |
| corn<br>straw    | 36.09               | 29.35                   | 3.910            | 2887                | 2348                    | 312.8            | 118.3            | 84.54            | 6.426               | 244.1            | 140.3              | 430.8            |
| soybean<br>straw | 31.93               | 14.94                   | 13.54            | 2554                | 1195                    | 1083             | 185.8            | 108.6            | 30.20               | 378.7            | 132.8              | 139.2            |
| reed<br>straw    | 35.32               | 25.81                   | 13.26            | 2826                | 2065                    | 1061             | 121.4            | 148.8            | 0.000               | 382.3            | 103.3              | 688.7            |
| pine             | 10.33               | 8.770                   | 62.30            | 826.4               | 701.6                   | 4984             | 417.0            | 148.5            | 37.01               | 582.6            | 178.5              | 715.3            |

---

---

## References

- [1] W. Wang, B. Cheng, M. Zhao, E. Anthony, R. Luque, D.D. Dionysiou, Boosting H<sub>2</sub> yield from photoreforming of lignocellulose by thermo-alkaline hydrolysis with selective generation of a key intermediate product: Tartaric acid, *Energy Convers. Manage.* 257 (2022) 115444. <https://doi.org/https://doi.org/10.1016/j.enconman.2022.115444>.
- [2] M. Yoo, Y.-S. Yu, H. Ha, S. Lee, J.-S. Choi, S. Oh, E. Kang, H. Choi, H. An, K.-S. Lee, J.Y. Park, R. Celestre, M.A. Marcus, K. Nowrouzi, D. Taube, D.A. Shapiro, W. Jung, C. Kim, H.Y. Kim, A tailored oxide interface creates dense Pt single-atom catalysts with high catalytic activity, *Energy Environ. Sci.* 13 (2020) 1231-1239. <https://doi.org/10.1039/C9EE03492G>.
